# Supplementary material for: Phosphorus transformations in plant-based and bio-waste materials induced by pyrolysis
Source: Springer Nature journal article supplement (doi:10.1007/s13280-017-0990-y), 2017-11-20
Supplement: MOESM1 [file 15654986]

*Ambio*

Electronic Supplementary Material

**Title: Phosphorus transformations in plant-based and bio-waste materials  
induced by pyrolysis**

Authors: James Stephen Robinson, Karen Baumann, Yongfeng Hu, Philipp  
Hagemann, Lutz Kebelmann, Peter Leinweber

**Appendix S1.** Reference standards selected for the P *K-edge* XANES spectroscopy.

Chemicals were purchased from Sigma-Aldrich Laborchemikalien GmbH, D-30926 Seelze, Germany.

Dicalcium phosphate:  $\text{CaHPO}_4$ , CAS 7757-93-9

Brushite:  $\text{CaHPO}_4 \cdot 2\text{H}_2\text{O}$ , CAS 7789-77-7

Calcium dihydrogen phosphate:  $\text{Ca}(\text{H}_2\text{PO}_4)_2 \cdot 2\text{H}_2\text{O}$ ; CAS 7757-93-9

Hydroxyapatite:  $\text{Ca}_5\text{H}(\text{PO}_4)_3 \cdot 2.5\text{H}_2\text{O}$ ; CAS 1306-06-5

Magnesium phosphate:  $\text{MgHPO}_4 \cdot 3\text{H}_2\text{O}$ , CAS 7782-75-4

Tri-magnesium phosphate:  $\text{Mg}_3(\text{PO}_4)_2 \cdot 8\text{H}_2\text{O}$ , CAS 13446-23-6

Magnesium pyrophosphate:  $\text{Mg}_2\text{O}_7\text{P}_2$ , CAS 13446-24-7

Aluminium phosphate:  $\text{AlPO}_4 \cdot x\text{H}_2\text{O}$ , CAS 66905-65-5

Aluminium metaphosphate:  $\text{Al}(\text{PO}_3)_3$ , CAS 13776-88-0

Iron (III) phosphate tetrahydrate:  $\text{FePO}_4 \cdot 4\text{H}_2\text{O}$ , CAS 31096-47-6

Sodium dihydrogen phosphate:  $\text{NaH}_2\text{PO}_4$ , CAS 7558-80-7

Disodium phosphate:  $\text{Na}_2\text{HPO}_4 \cdot 2\text{H}_2\text{O}$ , CAS 10028-24-7

Potassium dihydrogen phosphate:  $\text{KH}_2\text{PO}_4$ , CAS 7778-77-0

Dipotassium phosphate:  $\text{K}_2\text{HPO}_4 \cdot 3\text{H}_2\text{O}$ , CAS 16788-57-1

Tripotassium phosphate:  $\text{K}_3\text{PO}_4$ , CAS 7778-53-2

Potassium pyrophosphate:  $\text{K}_4\text{P}_2\text{O}_7$ , CAS 7320-34-5

Ammonium dihydrogen phosphate:  $\text{NH}_4\text{H}_2\text{PO}_4$ , CAS 7783-28-0

Di-ammonium phosphate  $(\text{NH}_4)_2\text{HPO}_4$ , CAS 7722-76-1

P sorbed to Fe oxides: Goethite (A16267, purchased from Alfa Aesar, Thermo Fisher, Kandel GmbH, D 76057, Karlsruhe/Germany), and 2-line-ferrihydrite

(prepared according to the method of Schwertmann and Cornell, 2008) were equilibrated with  $\text{KH}_2\text{PO}_4$  to achieve a desired P-concentration of  $2000 \mu\text{mol l}^{-1}$   $\text{KH}_2\text{PO}_4$  with 0.01 M  $\text{CaCl}_2$ -background electrolyte solution and initial pH of 6. The remaining solid matter was dried for 24 h at  $40^\circ\text{C}$  and stored in a desiccator.

P sorbed to Al oxides: A synthetic and commercially available gibbsite (analytical grade, Merck Millipore, D 64293 Darmstadt/Germany) was loaded with P as described for the Fe-oxides.

Phosphorylethanolamine: CAS 39382-08-6

Asolectin: MFCD00146015

Adenosine 5'-monophosphate disodium salt: CAS 4578-31-8

Adenosine 5'-diphosphate disodium salt: CAS 16178-48-6

Adenosine 5'-triphosphate disodium salt: CAS 34369-07-8

Phytic acid sodium salt hydrate: CAS 14306-25-3

2-aminoethylphosphonic acid: CAS 2041-14-7

Phenylphosphonic acid: CAS 1571-33-1

#### References:

Schwertmann U, Cornell RM: Iron Oxides in the Laboratory. Preparation and Characterization, Hoboken: Wiley-VCH, 2008.

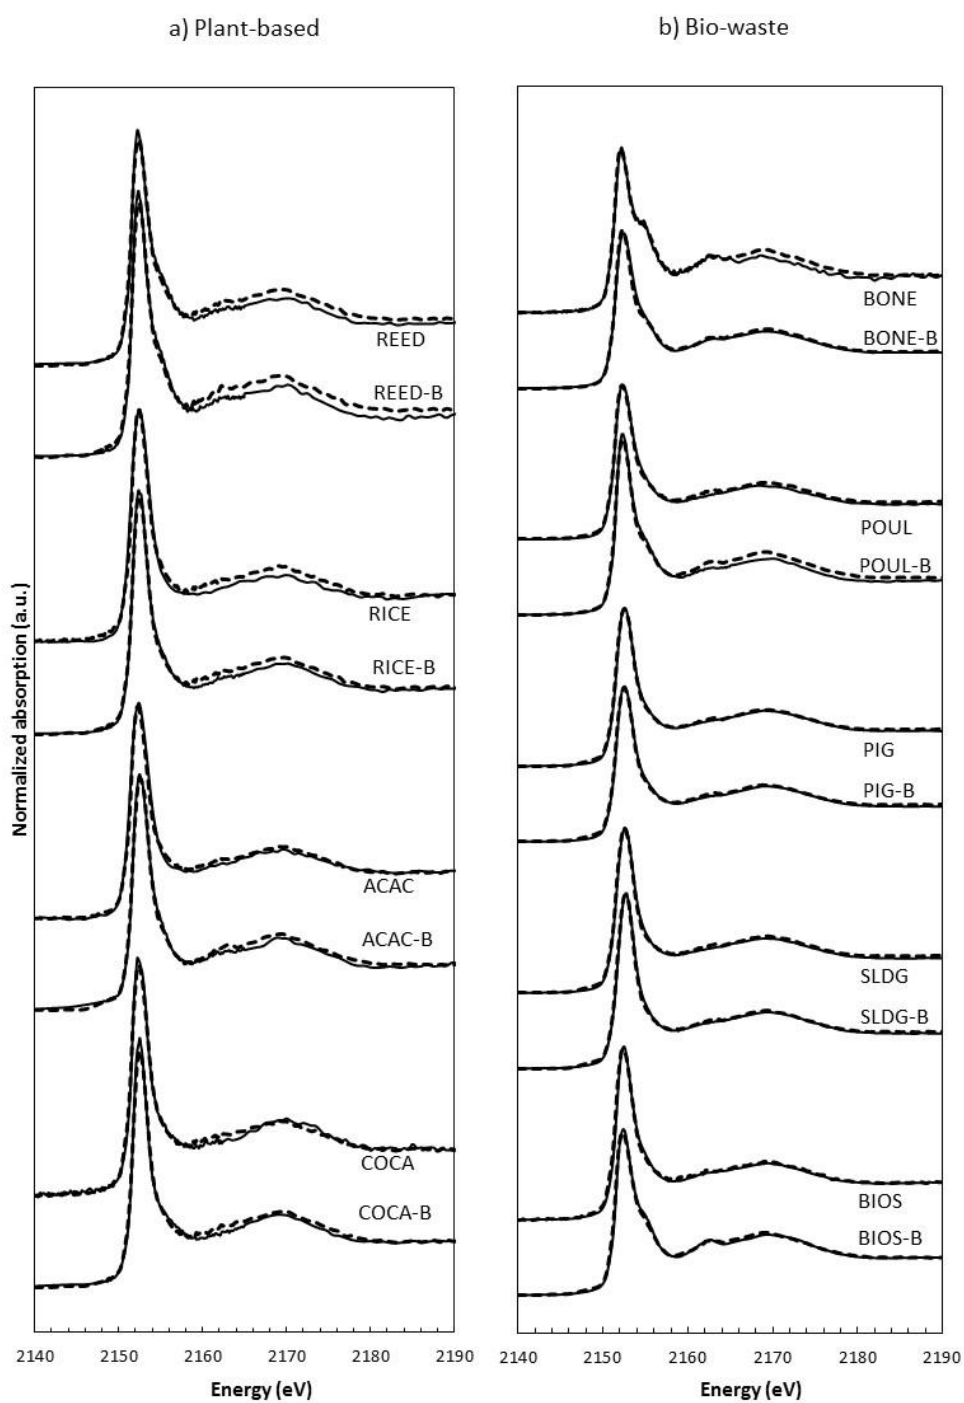

**Fig. S1** Stacked normalized P *K*-edge XANES spectra of the biomass feedstocks and their derived biochars (-B): a) plant-based and b) bio-waste materials. Spectra derived from the linear combination fitting of standards are presented as broken lines (-----).
